# Supplementary material for: Development of Plasmodium falciparum liver-stages in hepatocytes derived from human fetal liver organoid cultures
Source: PubMed Central journal article supplement (PMC10397232; doi:10.1038/s41467-023-40298-7), 2023-08-02
Supplement: 41467_2023_40298_MOESM1_ESM.pdf [file 41467_2023_40298_MOESM1_ESM.pdf]

## Supplementary Figures

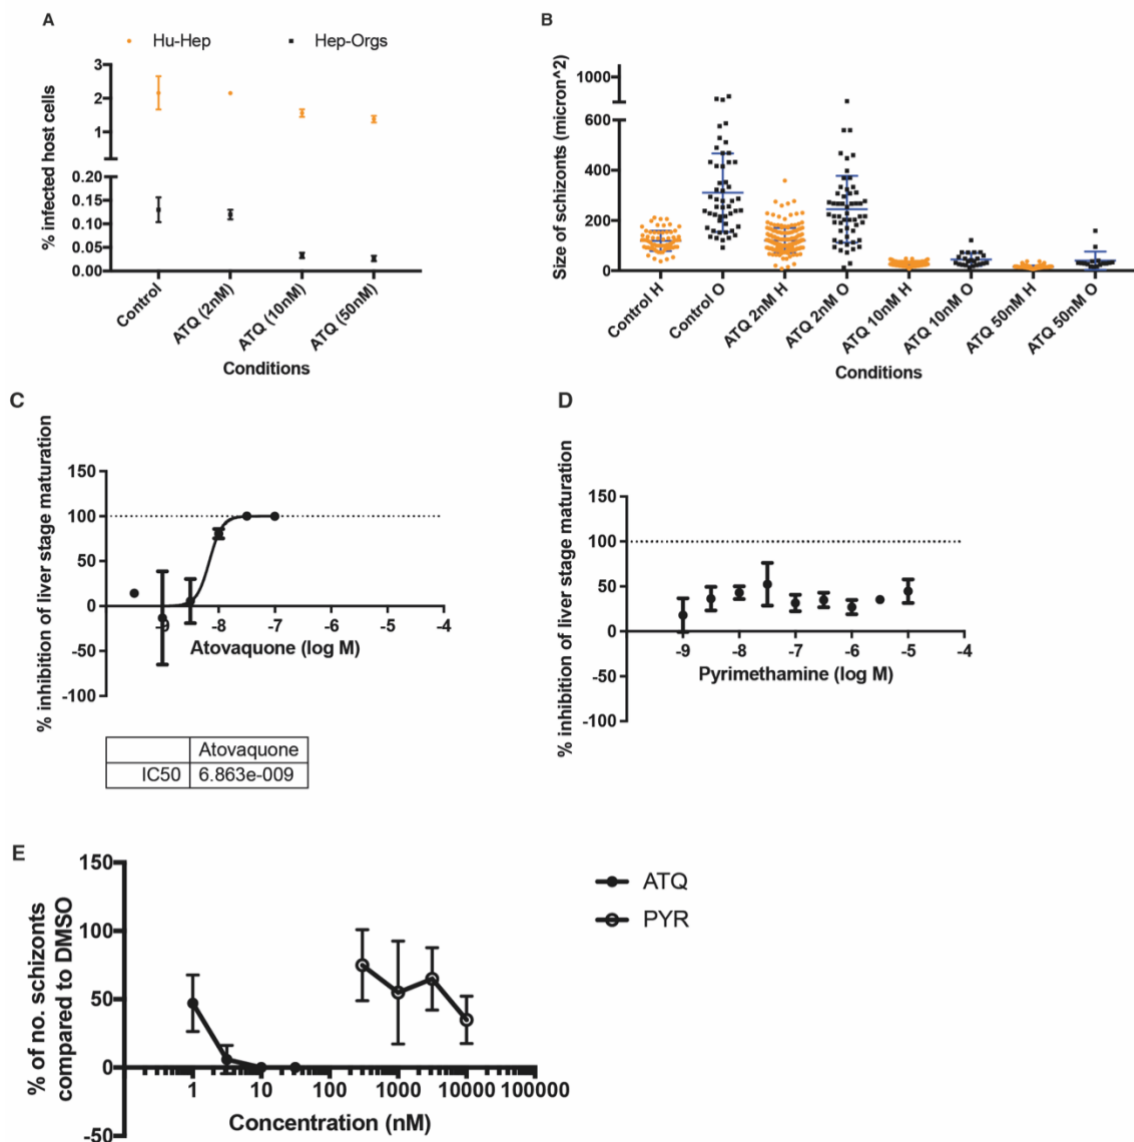

**Figure S1: Effect of atovaquone (ATQ) on schizont development in HuHeps and HepOrgs. A)**

The percentage of infected host cells (HuHep or HepOrg) under different concentrations of ATQ. Each point represents the average of duplicate (HuHep) and triplicate (HepOrg) measurements from one biological replicate ( $n = 1$ ; error bars show the mean  $\pm$  SD). **B)** The size of the schizonts in HuHep or HepOrg under different concentrations of ATQ. Each point represents the size of a schizont where at least 50 schizonts are measured for each condition: duplicates in HuHeps and triplicates for HepOrgs from one biological replicate ( $n = 1$ ; Error bar shows the mean  $\pm$  SD). The H and O denoted after each condition refers to either HuHeps or HepOrgs respectively. Cryopreserved HuHeps infected with PfNF175 and treated with

either **C**) atovaquone or **D**) pyrimethamine at various concentrations (n = 1; error bar shows mean  $\pm$  SD of three technical replicates). **E**) HepOrgs infected with PfNF175 treated with atovaquone and pyrimethamine (n = 1; error bar shows mean  $\pm$  SD of three technical replicates).

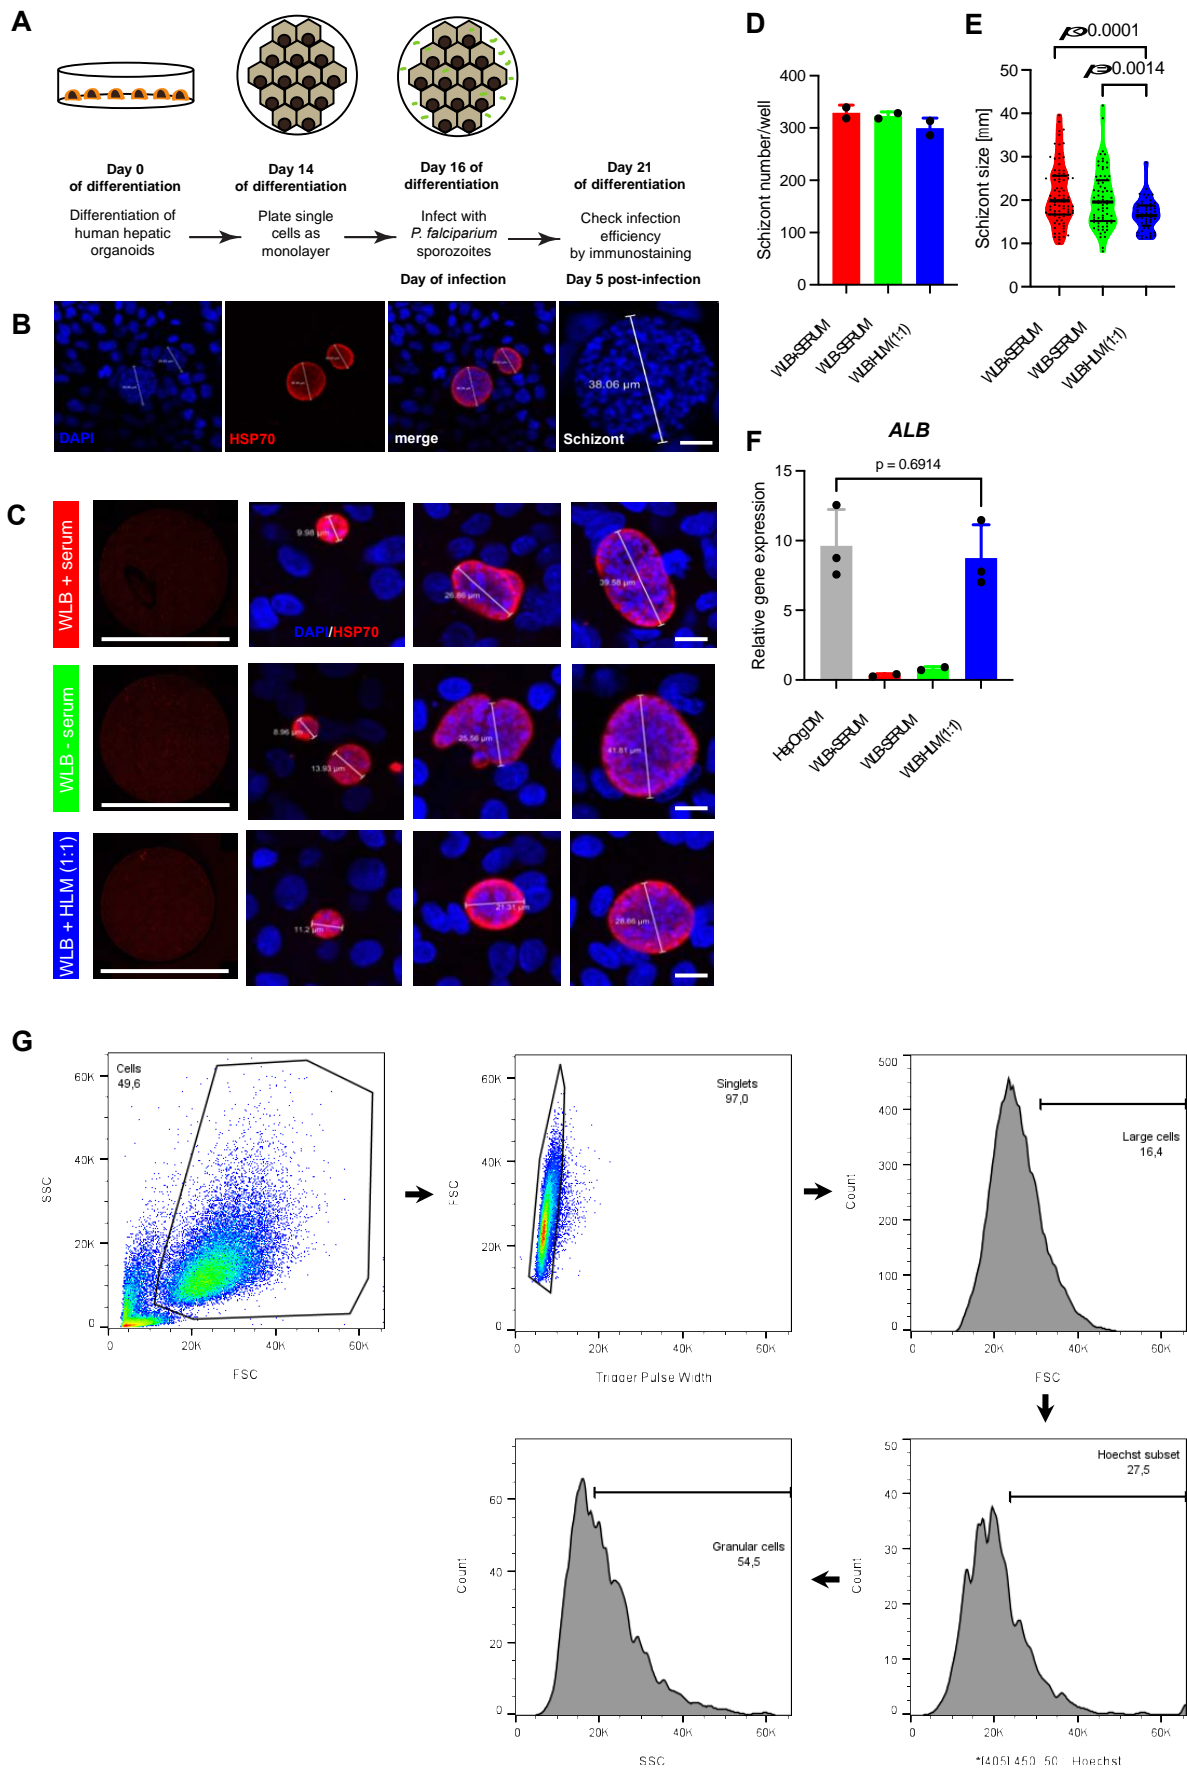

**Figure S2. Media tests and gating strategy for the infection experiments, related to Figure 2.** (A) Experimental schematic. (B-D) Immunostaining for schizont marker HSP70 in infected hepatocytes grown in different media (B, C) and the quantification of schizont number (D) and size (E) performed on samples collected day 5 post-infection ( $n = 2$  independent experiments). Each dot in D represents one independent experiment. Each dot in E represents an individual measurement (WLB+Serum,  $n=85$ ; WLB-Serum,  $n=75$ ; WLB:HLM,  $n=55$ ). (F) Real-time PCR for *ALB* expression ( $n = 2-3$  independent experiments). (G) Gating strategy for the single-cell sorting for RNA-seq. Data are represented as the mean average  $\pm$  SEM (D), median (Q2), 25<sup>th</sup> percentile (Q1) and 75<sup>th</sup> percentile (Q3) (E) and mean average  $\pm$  SD (F). Two-sided Mann–Whitney U (Wilcoxon rank-sum) test (E) and unpaired two-tailed student's t test (F). Source data are provided as a Source data file. Scale bars in C: left-hand side panels, 5 mm; right-hand side panels, 10  $\mu$ m.

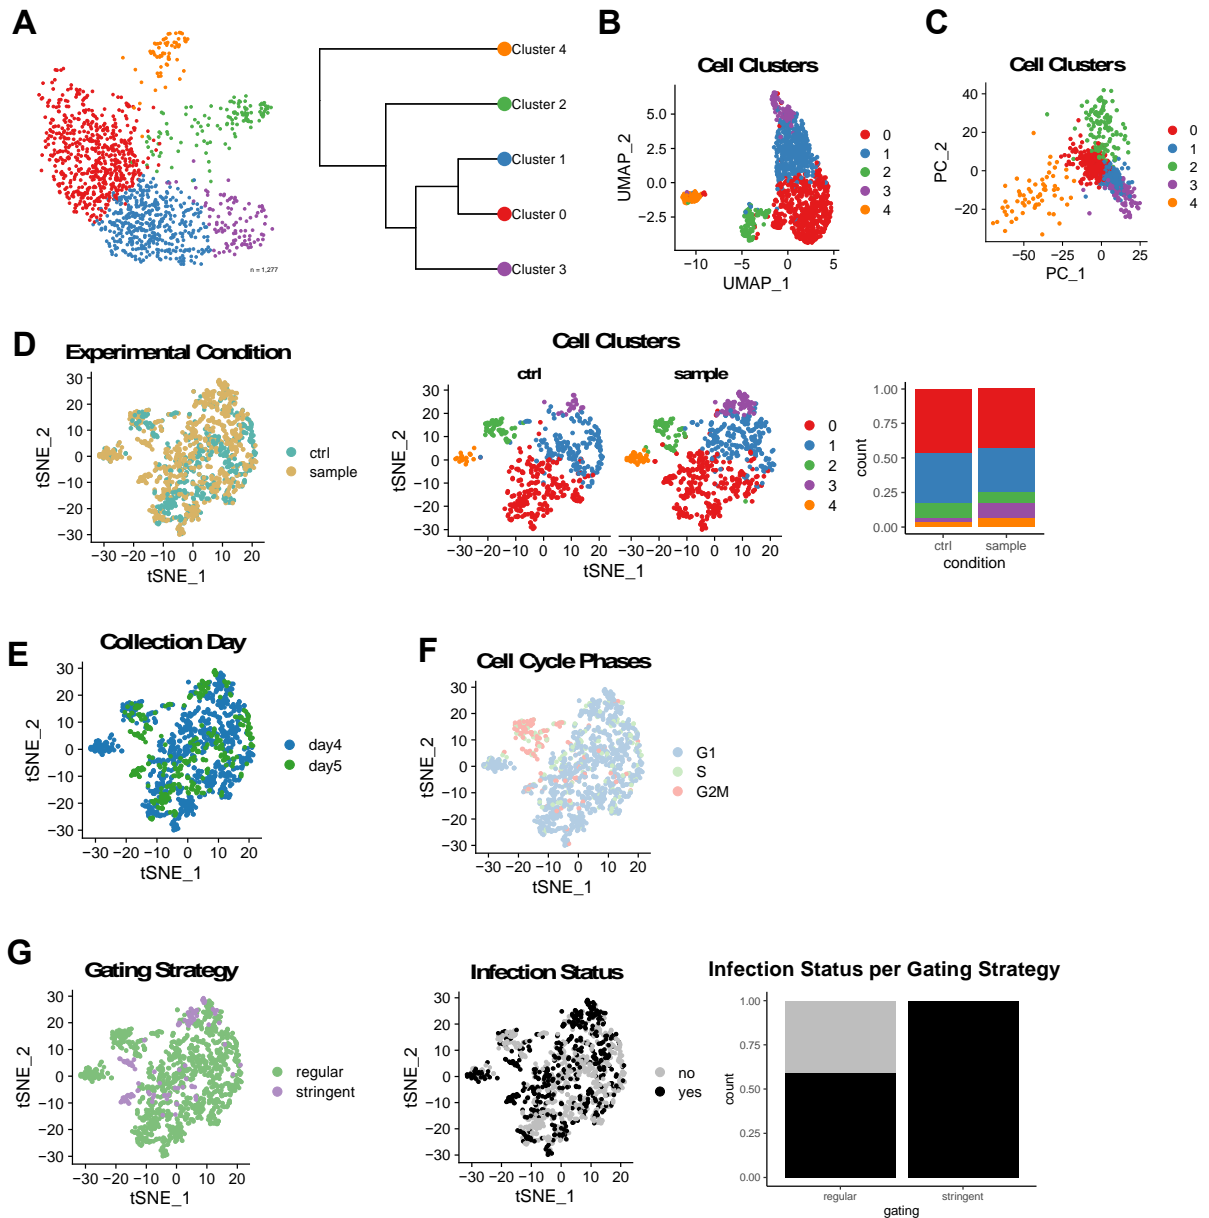

**Figure S3. Single-cell transcriptomes of the human reads, related to Figure 2. (A)** Shared nearest neighbor (SNN) graph of the 1277 human transcriptomes in the dataset showing the Seurat clusters (left) and cluster tree showing the relationships between the Seurat clusters (right). **(B, C)** UMAP (B) and PCA (C) maps showing the Seurat clusters. **(D)** *t*-SNE maps and cell proportion analysis of experimental conditions (ctrl, *n* = 533 cells; sample, *n* = 744 cells) and Seurat clusters. **(E-F)** *t*-SNE maps of the collection day (E; day4, *n* = 929 cells; day5, *n* = 348 cells) and cell cycle phases (F; G1, *n* = 959 cells, S, *n* = 183 cells; G2M, *n* = 135 cells). **(G)** Comparison of gating strategy for sample plates end enrichment for infected hepatocyte single cells (regular, *n* = 1151 cells; stringent, *n* = 126 cells; no, *n* = 787 cells; yes, *n* = 490 cells). Source data are provided as a Source data file and Supplementary Data 1

### A Maps of Hepatocyte Marker Expression used to Compute the Enrichment Score

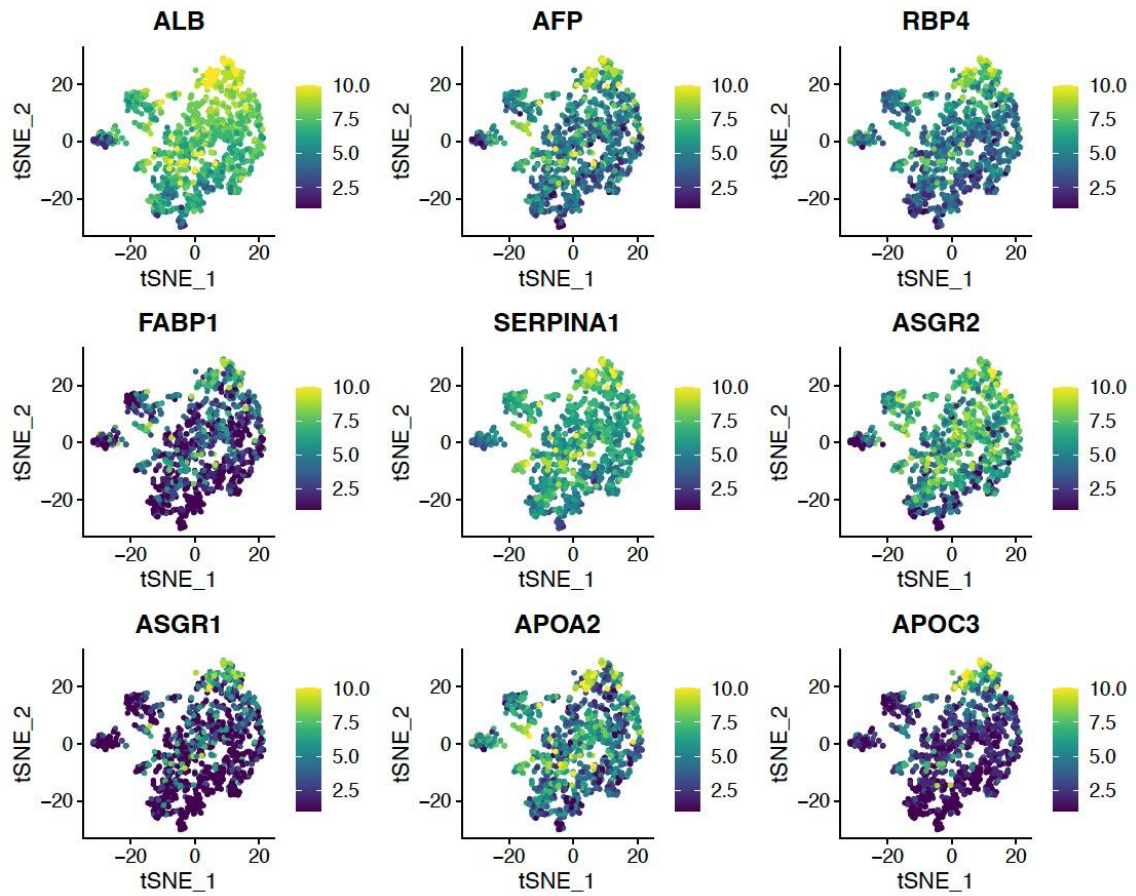

### B Map of Hepatocyte Enrichment Score

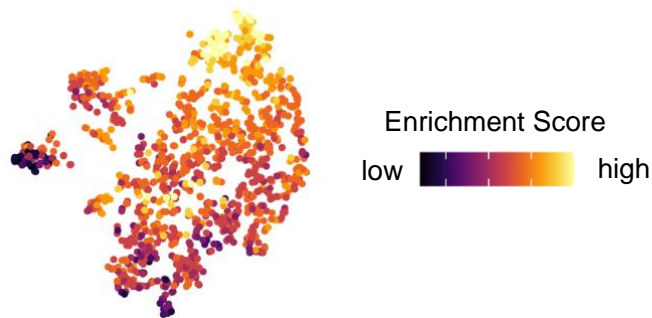

**Figure S4. Hepatocyte markers, related to Figure 2. (A, B) *t*-SNE maps ( $n = 1277$  cells) showing the expression of hepatocyte markers (A) as well as the computed hepatocyte enrichment score (B). Source data are provided as a Source data file and Supplementary Data 1.**

### A Maps of Cholangiocyte Marker Expression used to Compute the Enrichment Score

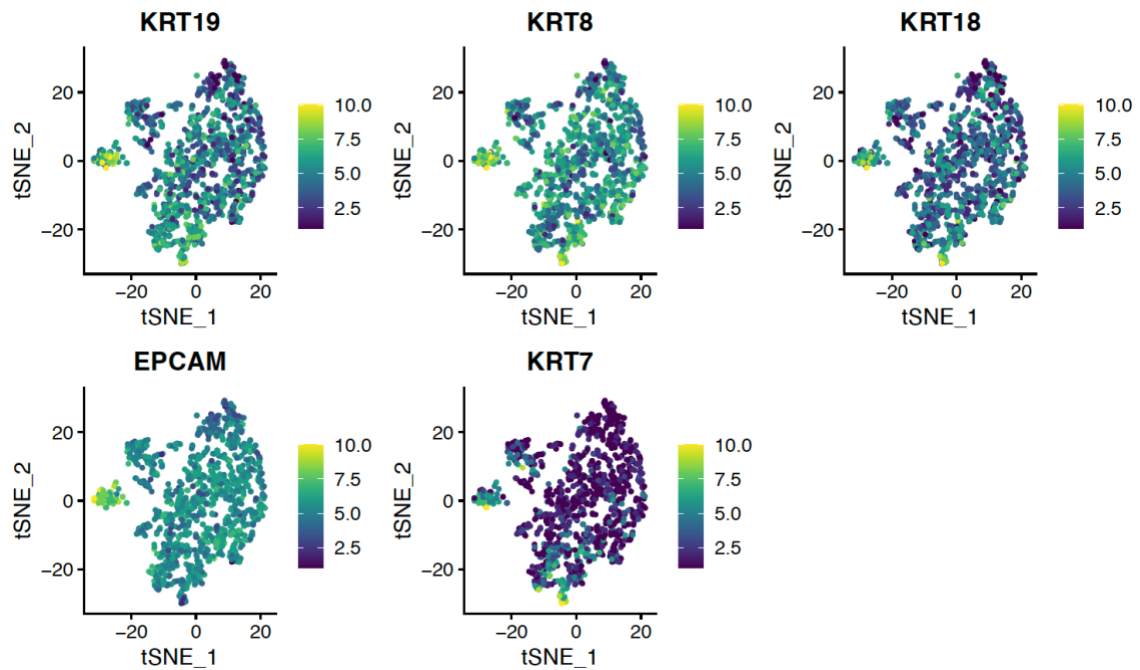

### B Map of Cholangiocyte Enrichment Score

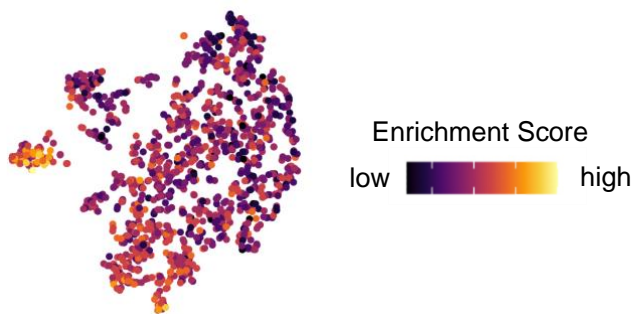

### C Cholangiocyte Signature

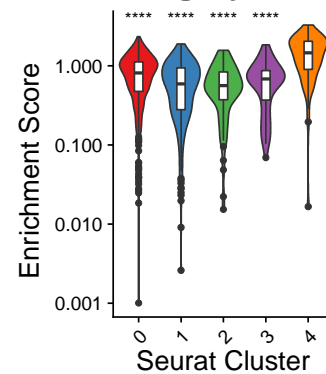

**Figure S5. Cholangiocyte markers, related to Figure 2. (A, B)** *t*-SNE maps ( $n = 1277$  cells examined) showing the expression of cholangiocyte markers (A) as well as the computed cholangiocyte enrichment score (B). **(C)** Violin plot showing the cholangiocyte enrichment score per Seurat cluster ( $n = 1,277$  cells examined). Box plots indicate the median (Q2), 25<sup>th</sup> percentile (Q1) and 75<sup>th</sup> percentile (Q3) with the whiskers showing the minimum ( $Q1 - 1.5 \times$  interquartile range) and maximum ( $Q3 + 1.5 \times$  interquartile range). Two-sided Mann–Whitney U (Wilcoxon rank-sum) test: \*\*\*\*  $p < 0.0001$ . Statistics were calculated in comparison to cluster 4:  $p < 2.5^{-11}$  (vs cluster 0),  $p < 2.4^{-16}$  (vs cluster 1),  $p < 1.1^{-12}$  (vs cluster 2),  $p < 8.9^{-9}$  (vs cluster 3). Source data are provided as a Source data file and Supplementary Data 1.

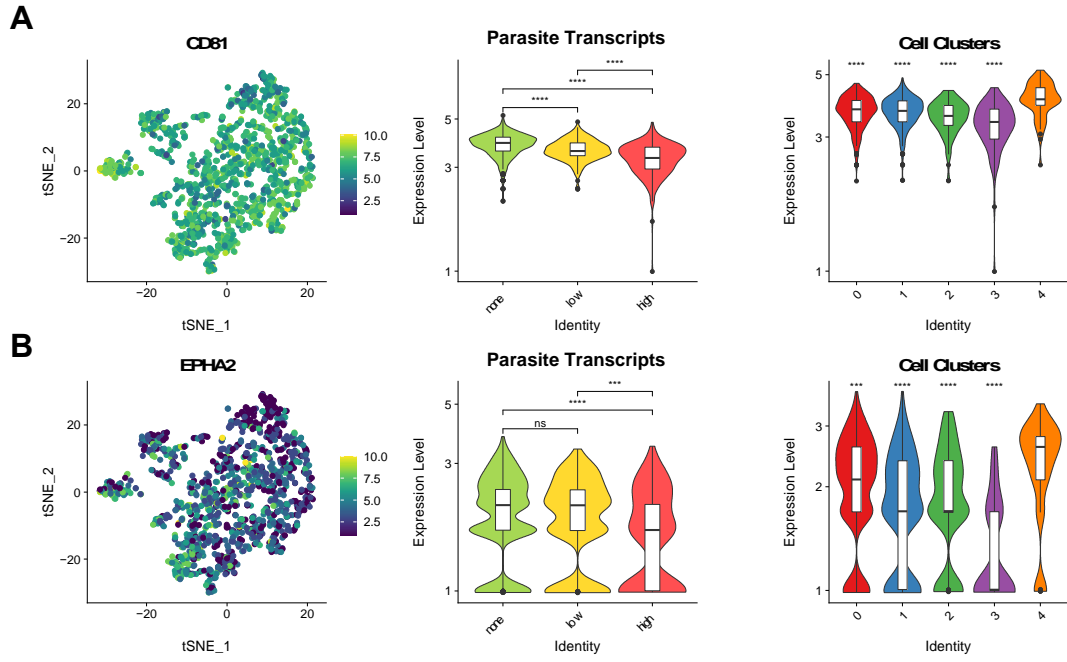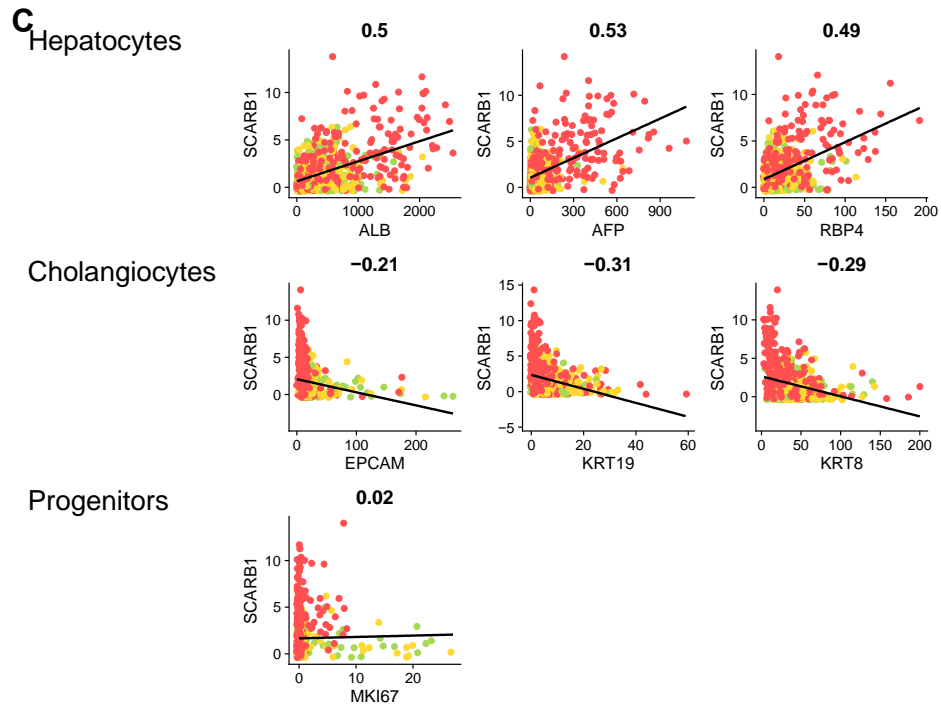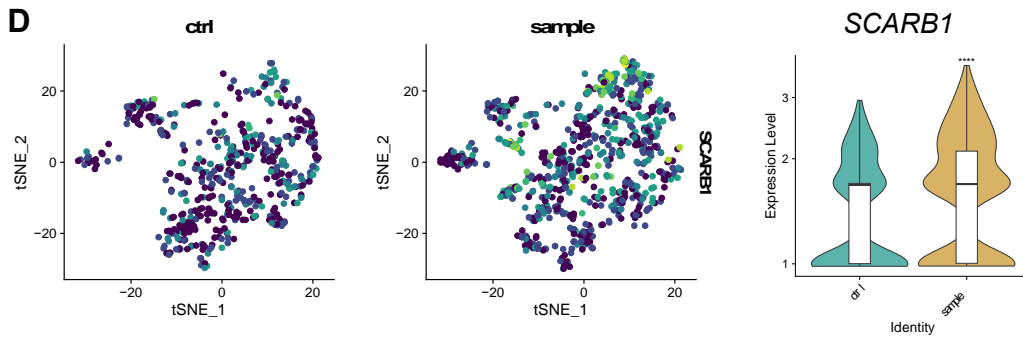



**Figure S6. Entry factors, related to Figure 2.** (A, B) *t*-SNE maps and violin plots ( $n = 1277$  cells) showing *the* expression of the genes encoding entry factors CD81 (A) and EPHA2 (B). (C) Correlation of *SCARB1* gene expression against markers of hepatocytes, cholangiocytes and progenitors. (D) *t*-SNE maps and violin plots showing *SCARB1* expression separated by controls (ctrl) plates (without parasite incubated hepatocytes,  $n = 533$  cells) and sample plates (with parasite incubated hepatocytes,  $n = 744$  cells). Data are represented using  $n = 1,277$  cells examined. Box plots indicate the median (Q2), 25<sup>th</sup> percentile (Q1) and 75<sup>th</sup> percentile (Q3) with the whiskers showing the minimum ( $Q1 - 1.5 \times$  interquartile range) and maximum ( $Q3 + 1.5 \times$  interquartile range). Two-sided Mann–Whitney U (Wilcoxon rank-sum) test: ns  $p \geq 0.05$ , \*\*\*  $p < 0.001$ , \*\*\*\*  $p < 0.0001$ . Statistics in (A) and (B) were calculated in comparison to cluster 4. A:  $p = 5.1^{-14}$  (none vs low),  $p < 2.22^{-16}$  (none vs high),  $p = 3.3^{-10}$  (low vs high);  $p = 1.2^{-8}$  (vs cluster 0),  $p = 8.6^{-9}$  (vs cluster 1),  $p < 1.5^{-10}$  (vs cluster 2),  $p = 1.8^{-13}$  (vs cluster 3). B:  $p = 0.068$  (none vs low),  $p = 4^{-9}$  (none vs high),  $p = 0.00074$  (low vs high);  $p = 0.00087$  (vs cluster 0),  $p = 1^{-8}$  (vs cluster 1),  $p = 1.7^{-5}$  (vs cluster 2),  $p = 1^{-14}$  (vs cluster 3). D:  $p = 1.1^{-10}$ . Source data are provided as a Source data file and Supplementary Data 1.

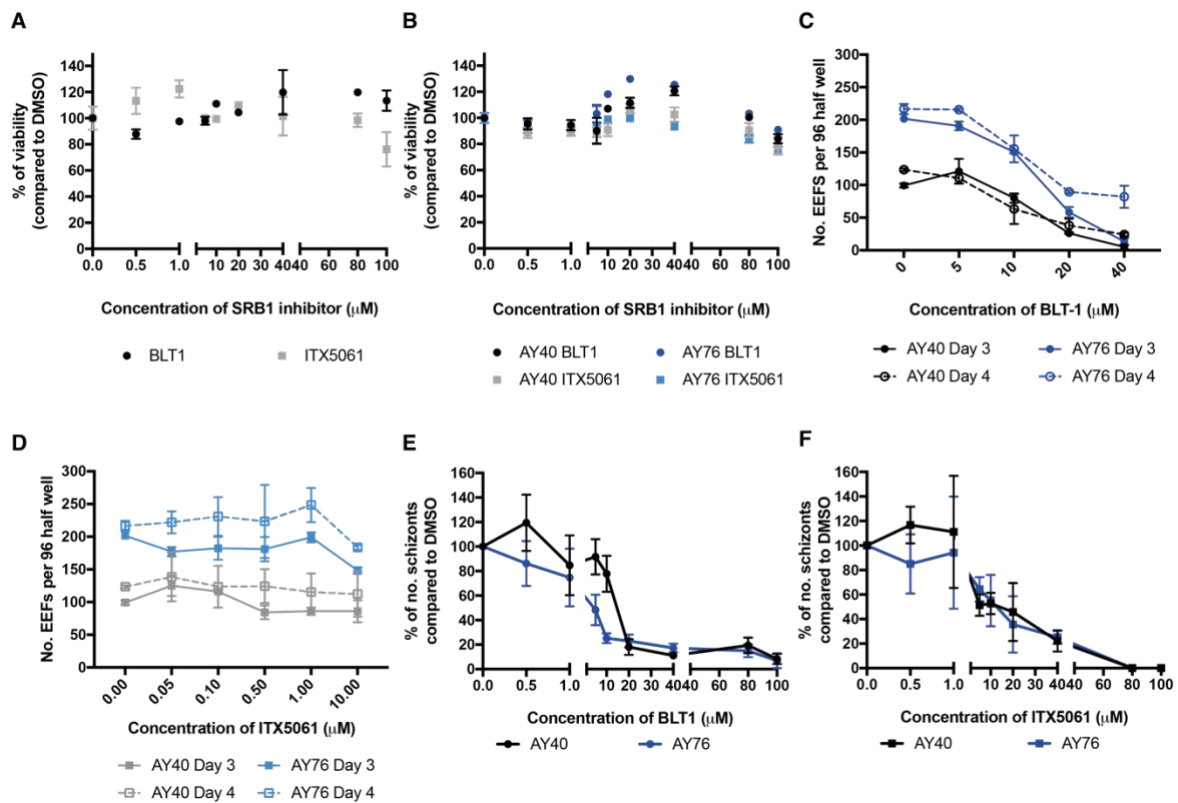

**Fig. S7: Dose-dependent effects of SRB1 inhibitors (BLT1 and ITX5061) on cell viability and Pf schizont development.** Percentage of viable cells of uninfected differentiated KK2 HepOrg ( $n = 1$ ; error bar is the mean  $\pm$  SD of three technical replicates) (A) cryopreserved human hepatocytes ( $n = 2$ ; error bar is the mean  $\pm$  SD of three technical replicates) AY 40 (black) and AY76 (blue) (B) treated with BLT1 (circle) or ITX5061 (square). Number of PfNF175 schizonts on day 7 p.i. after treatments with either BLT1 (C) or ITX5061 (D) added on either day 3 p.i. (closed) or day 4 p.i. (open) ( $n = 2$ ; error bar is the mean  $\pm$  SD of two/three technical replicates). Percentage of Pf schizonts compared to the control (DMSO) in primary cryopreserved hepatocytes AY 40 (blue) or AY 76 (black) treated on day 3 p.i. with either BLT1 (E) or ITX5061 (F). ( $n = 2$ ; error bar is the mean  $\pm$  SD of two/three technical replicates)

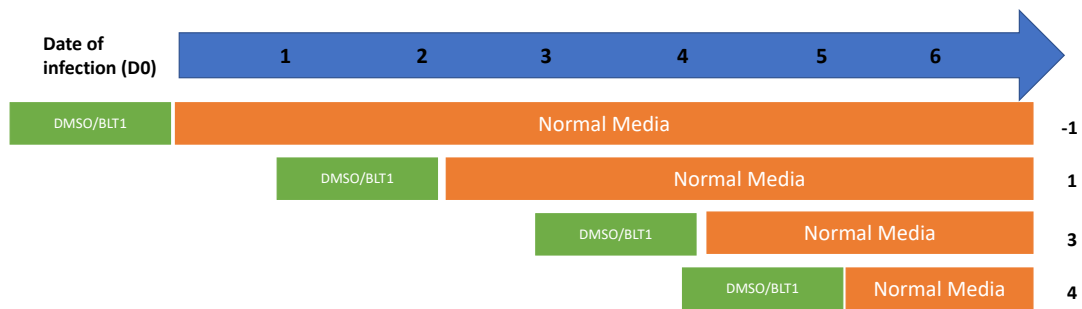

**Fig. S8, related to Figure 5.** Treatment schedule of BLT1 or DMSO on (un)infected primary hepatocytes. The infection process is stopped on day 7 post invasion.

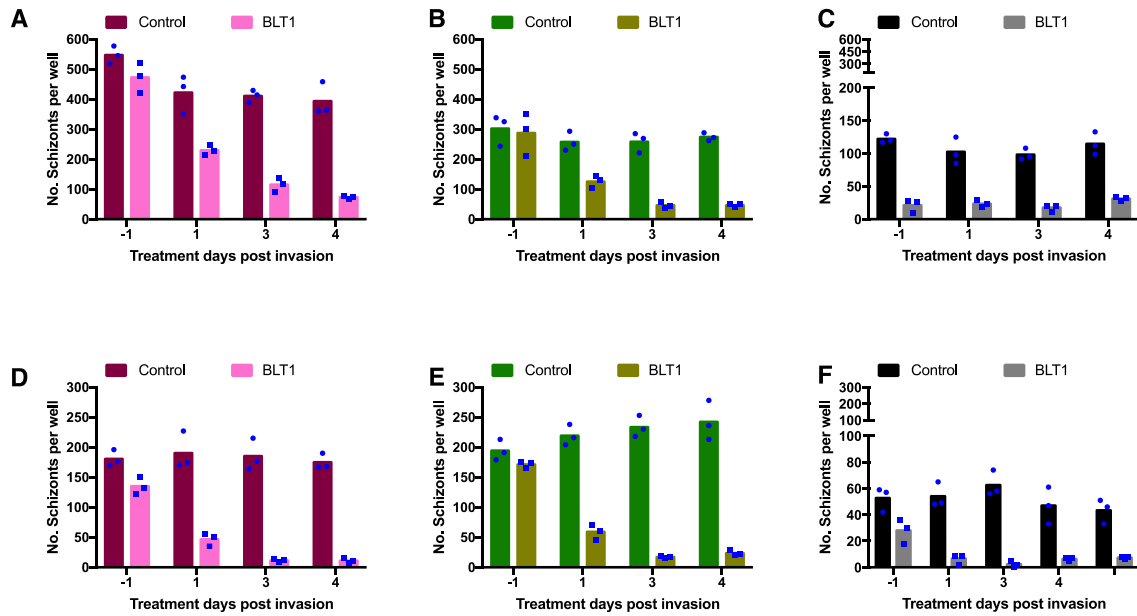

**Fig. S9: Effect of BLT1 inhibitor on the absolute number of Pf liver schizonts shown in Figure 5.** The number of schizonts in HuHeps infected with NF175 (A, D), NF135 (B, E) and NF54 (C, F) and treated with either DMSO or BLT1. Each dot represents a technical replicate, and each graph is an independent experiment. In total (per strain), two independent experiments (n = 2) each with 3 technical replicates were performed.

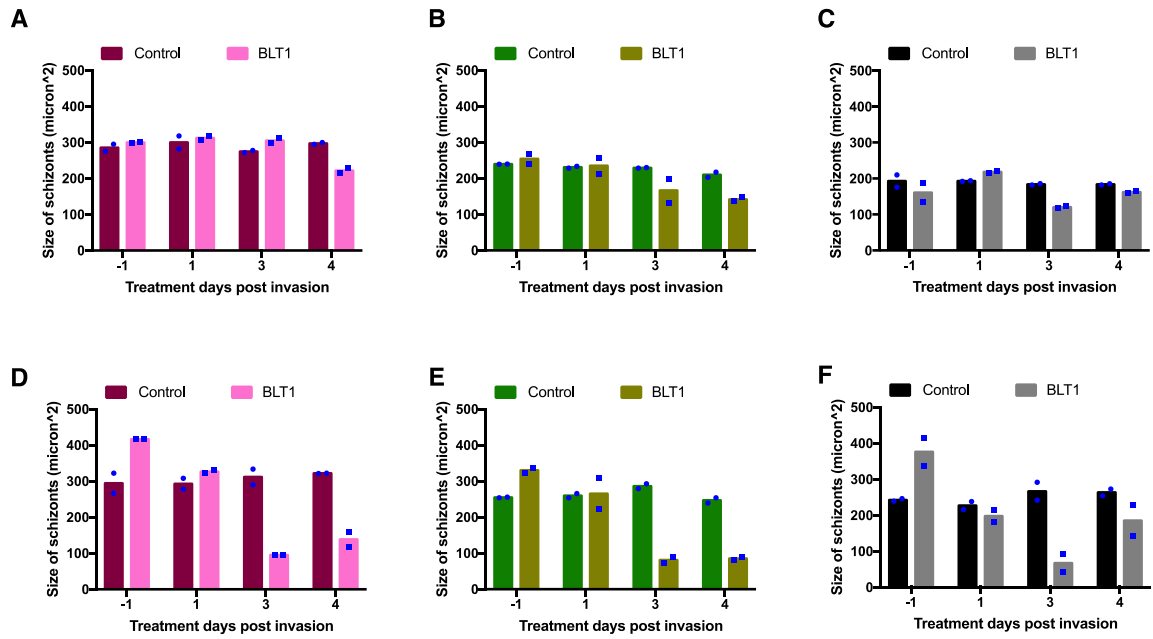

**Fig. S10: Effect of BLT1 inhibitor on the sizes of Pf liver stages, related to Figure 5.** The size of schizonts in HuHeps infected with NF175 (A,D), NF135 (B,E) and NF54 (C,F) and treated with either DMSO or BLT1. Each dot represents a technical replicate, and each graph is an independent experiment. In total (per strain), two independent experiments (n = 2) each with 3 technical replicates were performed.

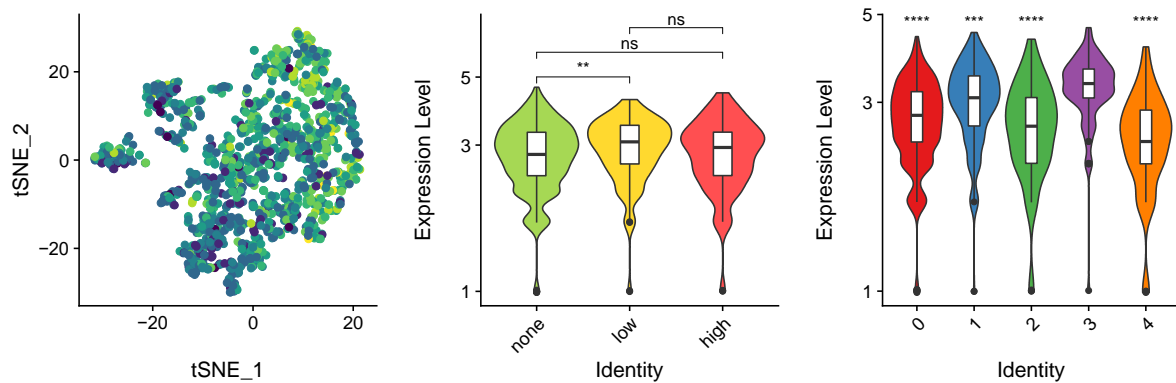

**Figure S11. Expression of *GLUL*, related to Figure 2.** *t*-SNE maps and violin plots showing the expression of the *GLUL* (encoding glutamine synthetase). Data are represented using  $n = 1,277$  cells examined. Box plots indicate the median (Q2), 25<sup>th</sup> percentile (Q1) and 75<sup>th</sup> percentile (Q3) with the whiskers showing the minimum (Q1 – 1.5 × interquartile range) and maximum (Q3 + 1.5 × interquartile range). Two-sided Mann–Whitney U (Wilcoxon rank-sum) test: ns  $p \geq 0.05$ , \*\*  $p < 0.01$ , \*\*\*  $p < 0.001$ , \*\*\*\*  $p < 0.0001$ . Statistics for the right-hand panel were calculated in comparison to cluster 3:  $p = 0.0011$  (none vs low),  $p = 0.45$  (none vs high),  $p = 0.067$  (low vs high);  $p < 2^{-16}$ . (vs cluster 0),  $p = 5^{-4}$  (vs cluster 1),  $p = 6.6^{-13}$  (vs cluster 2),  $p = 2.1^{-14}$  (vs cluster 4). Source data are provided as a Source data file and Supplementary Data 1.

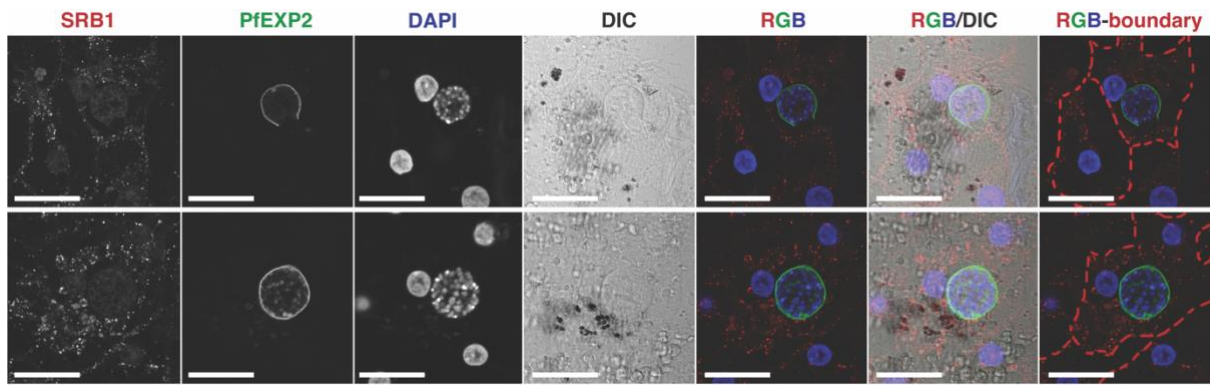

**Figure S12:** Confocal fluorescence microscopy images of PfNF175 infected primary human hepatocytes on day 5 post infection, stained with PfEXP2 (green: to denote the parasite), human SRB1 (red) and DAPI (blue). Scale bar is 25 microns. These are two representative images from one independent experiment.
